# Supplementary material
Source: PubMed Central journal article supplement (PMC3331938)
Supplement: NIHMS361964-supplement-02.pdf [file NIHMS361964-supplement-02.pdf]

Supplemental Table 1. Descriptive Data for Individual CVDRFs

| CVDRFs domain                               | Measurement                                   | Mean            | Range        | Cutoff score for abnormal group | N of participants (%) |
|---------------------------------------------|-----------------------------------------------|-----------------|--------------|---------------------------------|-----------------------|
| Abdominal obesity (Adults, 2001)            | • Waist circumference, cm                     | 99.66 (16.04)   | 64 – 266     | Male: >102<br>Female: >88       | 475 (63.6%)           |
|                                             | • BMI                                         |                 |              | ≥ 30                            |                       |
| Hypertension (Pearson et al., 2002)         | • Sitting systolic blood pressure, mmHg, OR   | 134.48 (17.10)  | 85 – 191     | ≥ 130                           | 487 (65.2%)           |
|                                             | • Sitting diastolic blood pressure, mmHg, OR  | 75.84 (10.54)   | 48 – 114     | ≥ 85                            |                       |
|                                             | • Currently taking antihypertensive treatment | -               | -            | yes                             |                       |
| Hypercholesterolemia (Adults, 2001)         | • Blood total cholesterol, mg/dL, OR          | 188.83 (41.29)  | 91 - 439     | ≥200                            | 383 (51.3%)           |
|                                             | • Blood HDL mg/dL                             | 52.97 (16.45)   | 19 – 115     | <40                             |                       |
| Hypertriglyceridemia (Pearson et al., 2002) | • Blood triglycerides, mg/dL                  | 147.05 (158.02) | 34 - 3299    | ≥150                            | 252 (33.7%)           |
| Diabetes <sup>a</sup>                       | • Blood hemoglobin A1c, %, OR                 | 6.08 (0.97)     | 3.80 – 15.20 | ≥7                              | 98 (13.1%)            |
|                                             | • Self-reported history of DM in past 12 mon  | -               | -            | yes                             |                       |
| Smoker (Pearson et al., 2002)               | • Smoking status                              | -               | -            | Current smoker                  | 103 (13.8%)           |

Note. <sup>a</sup> fasting glucose level was not available in this study.

**Supplemental Table 2.** Model Fit and Estimates of Direct and Indirect Effect between CVDRFs, Leisure Activities, Inflammatory Markers, and Cognitive Function in Baseline Models

|                                | Total sample (N = 747)                                                               | Middle-age group (n = 405)                                                                   | Old-age group (n = 342)                                                                      |
|--------------------------------|--------------------------------------------------------------------------------------|----------------------------------------------------------------------------------------------|----------------------------------------------------------------------------------------------|
| Model fit                      | X <sup>2</sup> = 26.94, df = 6, p < 0.001; CFI = 0.973; RMSEA = 0.068; SRMR = 0.017. | X <sup>2</sup> = 19.47, df = 6, p = 0.004; <b>CFI = 0.960</b> ; RMSEA = 0.074; SRMR = 0.022. | X <sup>2</sup> = 17.41, df = 6, p = 0.008; <b>CFI = 0.964</b> ; RMSEA = 0.075; SRMR = 0.019. |
| <b>Direct effect</b>           |                                                                                      |                                                                                              |                                                                                              |
| • CVDRFs – IL-6                | <b>0.144</b>                                                                         | <b>0.136</b>                                                                                 | <b>0.164</b>                                                                                 |
| • CVDRFs – CRP                 | <b>0.300</b>                                                                         | <b>0.330</b>                                                                                 | <b>0.291</b>                                                                                 |
| • CVDRFs – EM                  | -0.024                                                                               | 0.043                                                                                        | <b>-0.107</b>                                                                                |
| • CVDRFs – EF                  | -0.059                                                                               | -0.011                                                                                       | <b>-0.113</b>                                                                                |
| • IL-6 – EM                    | -0.020                                                                               | -0.003                                                                                       | -0.034                                                                                       |
| • IL-6 – EF                    | 0.000                                                                                | 0.084                                                                                        | -0.091                                                                                       |
| • CRP – EM                     | 0.006                                                                                | 0.035                                                                                        | -0.034                                                                                       |
| • CRP – EF                     | -0.005                                                                               | -0.037                                                                                       | 0.021                                                                                        |
| • Mental activities – IL-6     | 0.008                                                                                | 0.002                                                                                        | 0.002                                                                                        |
| • Mental activities – CRP      | 0.122                                                                                | <b>0.163</b>                                                                                 | 0.104                                                                                        |
| • Mental activities – EM       | <b>0.134</b>                                                                         | <b>0.128</b>                                                                                 | <b>0.151</b>                                                                                 |
| • Mental activities – EF       | <b>0.276</b>                                                                         | <b>0.267</b>                                                                                 | <b>0.297</b>                                                                                 |
| • Physical activities – IL-6   | <b>-0.061</b>                                                                        | -0.046                                                                                       | <b>-0.068</b>                                                                                |
| • Physical activities – CRP    | <b>-0.114</b>                                                                        | <b>-0.115</b>                                                                                | <b>-0.108</b>                                                                                |
| • Physical activities – EM     | 0.024                                                                                | 0.039                                                                                        | -0.005                                                                                       |
| • Physical activities – EF     | 0.014                                                                                | 0.013                                                                                        | 0.008                                                                                        |
| • Social activities – IL-6     | -0.033                                                                               | -0.014                                                                                       | -0.062                                                                                       |
| • Social activities – CRP      | -0.065                                                                               | -0.090                                                                                       | -0.053                                                                                       |
| • Social activities – EM       | -0.026                                                                               | 0.040                                                                                        | -0.091                                                                                       |
| • Social activities – EF       | 0.010                                                                                | 0.025                                                                                        | -0.007                                                                                       |
| <b>Interaction with CVDRFs</b> |                                                                                      |                                                                                              |                                                                                              |
| • Mental activities – IL-6     | -0.035                                                                               | 0.043                                                                                        | <b>-0.102</b>                                                                                |
| • Mental activities – CRP      | 0.026                                                                                | 0.115                                                                                        | -0.059                                                                                       |
| • Mental activities – EM       | -0.042                                                                               | -0.089                                                                                       | -0.038                                                                                       |
| • Mental activities – EF       | 0.049                                                                                | 0.022                                                                                        | 0.060                                                                                        |
| • Physical activities – IL-6   | 0.003                                                                                | -0.031                                                                                       | 0.032                                                                                        |
| • Physical activities – CRP    | 0.008                                                                                | 0.030                                                                                        | 0.048                                                                                        |
| • Physical activities – EM     | 0.033                                                                                | -0.051                                                                                       | <b>0.117</b>                                                                                 |
| • Physical activities – EF     | -0.035                                                                               | -0.047                                                                                       | -0.038                                                                                       |
| <b>Indirect effect</b>         |                                                                                      |                                                                                              |                                                                                              |
| • CVDRFs – EM (via IL-6)       | -0.003                                                                               | 0                                                                                            | -0.006                                                                                       |
| • CVDRFs – EF (via IL-6)       | 0                                                                                    | 0.011                                                                                        | -0.015                                                                                       |
| • CVDRFs – EM (via CRP)        | 0.002                                                                                | 0.012                                                                                        | -0.010                                                                                       |
| • CVDRFs – EF (via CRP)        | -0.002                                                                               | -0.012                                                                                       | 0.006                                                                                        |

*Note.* Note. Age and sex were covariates of inflammatory markers and cognitive function; education and depression were covariates of cognitive function. Bold data indicate significant estimates. EM = Episodic memory; EF = Executive function.
